# Supplementary material for: GPU-FS-kNN: A Software Tool for Fast and Scalable kNN Computation Using GPUs
Source: PubMed Central journal article supplement (PMC3429408; doi:10.1371/journal.pone.0044000), 2012-08-28
Supplement: pone.0044000.s001.pdf [file pone.0044000.s001.pdf]

# Supporting Information File S1

## Documented Source Code

In this section we will discuss the source code of the GPU-based fast and scalable  $k$ NN (FS $k$ NN) method. We performed our computational tests on the following hardware setup. Four NVIDIA Tesla C2050 GPU cards installed on a Xenon Nitro T5 Super-micro server that has Dual Xeon 5620 2.4GHz processors, 32GB of 1066 MHz DDR3 RAM and 800GB of Local Hard Disk. The programs were written in C++ and CUDA and compiled using the g++ 4.4.4 and nvcc compiler on a Linux OS, Kernel version 2.6.9.

**Source code compilation.** The code can be compiled using NVIDIA CUDA compiler driver nvcc release 3.0 and up. It will require OpenMP support (“-fopenmp -lgomp”) to handle multiple GPUs and Boost library to parse the input files.

## Algorithm: GPU-FS $k$ NN

---

**Algorithm 1: Fast and Scalable  $k$ NN Algorithm (FS $k$ NN)**

---

**Input** :  $\text{In}$ , input matrix or a portion of the input matrix;  
 $n_{\text{chunksize}}$ , dimension of the sub-matrix (chunk);  
 $k$ , number of nearest neighbors;

**Output**: The  $k$ NN graph stored in  $\text{Gk}$ ;

```
1 create Gk;
2 Gk[i].weight ← float_max, for i ← 0...(n_row - 1);
3 initialize (segments, n_GPU);
4 foreach segment ∈ segments do
5     create D;
6     create Gk';
7     host → device (In, D, Gk');
8     initialize (splits, segment);
9     create Maxk;
10    foreach split ∈ splits do
11        initialize Maxk;
12        host → device (Maxk);
13        initialize (chunks, split);
14        foreach chunk ∈ chunks do
15            Call Distance Kernel <<<grid1, block1>>> (In, n_chunksize,
16                split, chunk, b);
17            Call kNN Kernel<<<grid2, block2>>>(D, n_chunksize,
18                Maxk);
19        device → host (Gk');
20 return Gk;
```

---

The algorithm starts with an input matrix  $\text{In}$  and produces a  $k$ NN graph ( $\text{Gk}$ ). First, the `weight` attribute of each edge in the  $k$ NN graph is set to the maximum value of float (`float_max`) and the number of available GPUs (`n_GPU`) is assigned as the maximum number of segments (`segments`). The computational tasks for each of these segments are handled by separate GPUs. During the execution of each segment, the algorithm creates an array  $D$  (for holding a chunk of the matrix) and an additional pointer array  $\text{Gk}'$  linked to  $\text{Gk}$  (for holding the partial  $k$ NN graph of the respective segment) and transfers them to the device memory. Now to compute the partial  $k$ NN graph, the algorithm executes all the splits in each segment and subsequently all the chunks in each split. For each chunk the algorithm invokes the `Distance kernel` to compute a sub-matrix/chunk ( $D$ ) and the `kNN Kernel` to compute an intermediate  $k$ NNs list. This list eventually becomes a partial  $k$ NN graph (stored in  $\text{Gk}'$ ) when all the chunks in a split and all the splits in a segment are executed completely. Then, the  $\text{Gk}'$  is transferred to host and mapped to the respective location in  $\text{Gk}$ .

## Implementation: `fsknn()` function

```
1  /* fsknn function to represent the fsknn algorithm.
2  * Input parameters:
3  * @param filenameOut : Output File name
4  * @param Ina         : Input matrix (nRow x nCol)
5  * @param nRow        : Total number of rows in the input matrix
6  * @param nCol        : Total number of columns in the input matrix
7  * @param chunkSize   : Total number of rows/columns in a chunk
8  * @param k           : The integer value of k.
9  * Output:
10 * Graph(kNN) will be written in (filenameOut).knn file in
11 * the following format:
12 *
13 * number of vertices, number of edges
14 * source, target, weight
15 * ....
16 * source, target, weight
17 */
18
19 int fsknn(char *filenameOut, float *Ina, int nRow, int nCol,
20          int chunkSize, int k)
21 {
22     /* define thread and blocks for Distance Kernel */
23     dim3 blocksD (chunkSize/b,chunkSize/b);
24     dim3 threadsD (b,b);
25
26     /* define thread and blocks for kNN Kernel */
27     int threadsK = 512; // maximum number of threads allowed
28     int blocksK = chunkSize / threadsK+1;
29
30     /* Declare local variables */
31     float3 *Gka;
32     int nRowExtended;
33     int nColExtended;
34     int nExtraCol;
35     int nExtraRow;
36     int splitSize;
37     int segmentSize;
38
39     /* Extend the columns */
40     nColExtended = nCol;
41     while (nColExtended % b !=0) {
42         nColExtended++;
43     }
44     nExtraCol = nColExtended - nCol;
45
46
47     /* Extend the rows */
```

```

48     nRowExtended = nRow;
49     while (nRowExtended % chunkSize !=0){
50         nRowExtended++;
51     }
52     nExtraRow = nRowExtended - nRow;
53
54     /* Identify total number of chunks in a split */
55     splitSize = nRowExtended / chunkSize;
56
57     /* Allocate memory to store the kNN graph*/
58     Gka = (float3) malloc (sizeof(float3) * nRowExtended * k);
59
60     for (int i = 0; i < nRowExtended * k; i++)
61         Gka[i].z = MaxValue; //initialize weights
62
63     /* Setup multi-GPUs */
64     int nGpu = 0;
65     cudaGetDeviceCount(&nGpu); //get the number of GPUs
66
67     if(nGpu < 1){
68         printf("no CUDA capable devices were detected!\n");
69         return 0;
70     }
71
72     if(nGpu > splitSize) nGpu = splitSize; // for small matrices
73
74     /* Identify total number of splits in a segment */
75     segmentSize = splitSize / nGpu;
76
77     /* show some statistics on host and device */
78     printf("number of host CPUs:\t%d\n", omp_get_num_procs());
79     printf("number of CUDA devices:\t%d\n", nGpu);
80
81     for(int i = 0; i < nGpu; i++)
82     {
83         cudaDeviceProp dprop;
84         cudaGetDeviceProperties(&dprop, i);
85         printf(" %d: %s\n", i, dprop.name);
86     }
87
88     printf("-----\n");
89
90     printf("#chunks in each split (splitSize): %d\n",splitSize);
91     printf("#splits in each segment (segmentSize):%d\n",segmentSize);
92
93     printf("-----\n");
94
95
96
97

```

```

98  /* Implementation of the FSkNN algorithm */
99
100     /* Set the number of threads = the number of available GPUs */
101     omp_set_num_threads(nGpu);
102
103     /* outer loop, in parallel for each segment (GPU) */
104     #pragma omp parallel
105     {
106         /* Host variables */
107         float *Da;
108         int *Maxka;
109         float3 *Gka_sub; // a pointer to the partial kNN graph
110         unsigned int Gka_sub_bytes;
111
112         /* Device variables */
113         float *dev_Ina, *dev_Da;
114         int *dev_maxArray;
115
116         int tid = omp_get_thread_num();
117         int numthread = omp_get_num_threads();
118         int gpuid = -1;
119
120         /* Set GPU by the thread id */
121         cudaSetDevice(tid);
122         cudaGetDevice(&gpuid);
123
124         /* Allocate memory on host */
125         Da = (float*) malloc(sizeof(float)* chunkSize*chunkSize);
126         Maxka = (int*)malloc(sizeof(int)*chunkSize);
127
128         /* Allocate memory on device */
129         cudaMalloc((void **) &dev_Ina,nRow*nCol*sizeof(float));
130         cudaMalloc((void **) &dev_Da,
131                 chunkSize*chunkSize*sizeof(float));
132         cudaMalloc((void **) &dev_maxArray,
133                 chunkSize*sizeof(int));
134
135         /* Copy Ina[] and Da[] to device */
136         cudaMemcpy(dev_Ina, Ina, nRow*nCol*sizeof(float),
137                 cudaMemcpyHostToDevice);
138         cudaMemcpy(dev_Da, Da, chunkSize*chunkSize*sizeof(float),
139                 cudaMemcpyHostToDevice);
140
141         int splitBegin = tid * segmentSize;
142         int splitEnd= splitBegin + segmentSize;
143
144
145
146
147

```

```

148     /*For last split*/
149     if (( splitSize - 1 )- splitEnd <= segmentSize )
150         splitEnd = splitSize;
151
152     Gka_sub = Gka + (tid*chunkSize*k)*(splitSize/numthread);
153
154     /* Calculate bytes used by the partial kNN graph */
155     Gka_sub_bytes = (((tid+1)* chunkSize * k
156                     * (splitEnd-splitBegin)
157                     - (tid*chunkSize * k
158                     * (splitEnd - splitBegin)))
159                    * sizeof( float3));
160     float3 * dev_Gka_sub = 0;
161     cudaMalloc(( void **) &dev_Gka_sub,Gka_sub_bytes );
162     cudaMemset (dev_Gka_sub,0,Gka_sub_bytes);
163     cudaMemcpy (dev_Gka_sub,Gka_sub,Gka_sub_bytes,
164                cudaMemcpyHostToDevice);
165
166     /* Loop over all the splits in a segment*/
167     for (int split = splitBegin; split < splitEnd ; split++){
168
169         /* Copy Maxka[] to the device */
170         for (int r=0;r<chunkSize;r++)
171             *(Maxka + r) = (split - tid * segmentSize)
172                           * k * chunkSize + r * k;
173         cudaMemcpy (dev_maxArray, Maxka,
174                   chunkSize * sizeof(int),
175                   cudaMemcpyHostToDevice);
176
177         /* Loop over all the chunks in a split*/
178         for (int chunk = 0; chunk < splitSize; chunk++){
179
180             // Call Distance Kernel
181             PearsonDistanceKernel <<<blocksD,threadsD>>>
182             (dev_Ina, dev_Da, chunkSize, split, chunk,
183              nRow,nCol,nExtraCol, nColExtended);
184
185             // Call kNN Kernel
186             kNNKernel <<< blocksK, threadsK >>>
187             (dev_Da, dev_Gka_sub, dev_maxArray,
188              chunkSize, nExtraRow, split, chunk, splitSize,
189              nRow, tid,segmentSize, k);
190         }
191     }
192     /*Copy back the partial kNN graph for a split*/
193     cudaMemcpy(Gka_sub, dev_Gka_sub,
194                Gka_sub_bytes,cudaMemcpyDeviceToHost);
195
196
197

```

```

198  /* Deallocate device memory */
199      cudaFree(dev_Ina);
200      cudaFree(dev_Da);
201      cudaFree(dev_maxArray);
202      cudaFree(dev_Gka_sub);
203  }    // Close OpenMP loop
204
205
206  /*Write down the kNN graph into an external file (filename.knn)*/
207
208      FILE * pFile;
209      pFile = fopen (filenameOut,"w");
210
211      if (pFile!=NULL) {
212          fprintf(pFile,"%d %d\n",nRow, nRow * k);
213          for (int i = 0; i < nRow*k; i++)
214
215              // source, target and weight
216              fprintf(pFile,"%d %d %f\n",
217                  int(Gka[i].x),
218                  int(Gka[i].y),
219                  Gka[i].z);
220          fclose (pFile);
221      }
222      return 0;
223  }

```

## Distance Kernel Algorithm

---

### Algorithm 2: Distance kernel Algorithm

---

```

Input : In, input matrix or a portion of the input matrix;
          nchunksize, dimension of the distance matrix chunk;
          split, index of split;
          chunk, index of chunk;
          b, data block size;

Output: none, a chunk of the original distance matrix stored in D;

1 create two shared memory arrays, X and Y to load data blocks of size
  (b × b) from In;
2 /* Identify the thread and block indices */;
3 bx ← blockIdx.x, by ← blockIdx.y;
4 tx ← threadIdx.x, ty ← threadIdx.y;
5 /* Identify the data blocks to process */;
6 Xbegin ← (bx + nchunksize/b × chunk) × b × ncol;
7 Ybegin ← (by + nchunksize/b × split) × b × ncol;
8 Yend ← Yend + ncol - 1;
9 d ← 0;
10 for y ← Ybegin by b, x ← Xbegin to Yend do
11   Y[ty][tx] ← In[y + ty × ncol + tx];
12   X[tx][ty] ← In[x + ty × ncol + tx];
13   synchronize.threads();
14   foreach column i ∈ ncol to b do
15     if (n'col - ncol) ≠ 0 and y ≥ (Ybegin + n'col - b) and i
16       ≥ (ncol - n'col + b) then
17         continue /* exclude extra (pad) columns */;
18         d ← d + distance (or similarity) between data in Y[ty][i]
19         and X[i][tx];
20   synchronize.threads();
19 /*Identify location of the computed distance in the chunk */;
20 index ← by × b × nchunksize + ty × b + bx × b + tx;
21 D[index] ← d;

```

---

**Computation of the Distance Kernel.** The Distance kernel is presented as a template function which be adapted for several types distance measures, such as *Euclidean* or *Manhattan* distance or similarity measures that are based on *Pearson's* or *Spearman's* correlation. Here, each thread is responsible for computing a single distance in the matrix. The threads are organized in a 2-dimensional CUDA thread and block structure. Although the basic algorithm and the thread organization have been adapted from Chang et al. [1, 2], we modified it to compute a chunk of the distance matrix instead of the



complete distance matrix. The working procedure of the algorithm is simple, during each iteration, every thread block loads ( $b \times b$ ) sized data blocks from the input matrix  $In$  to single dimensional shared memory arrays  $X$  and  $Y$ . Then after synchronization and each thread starts to calculate and accumulate own partial distances in  $d$ . When the distance values are finalized, each thread stores  $d$  to the appropriate location in  $D$ . It should be noted here that the algorithms in [1, 2] were designed to work only with the data sets where the number of rows and columns are multiples of 16 only (i.e., the *data block* size,  $b=16$ ). This limitation was imposed so that all threads in any half-warp (a *warp* = 32 threads) can access the data in a sequence. We modified the original algorithm by introducing padded input matrix rows and columns so that the algorithm can work with any number of rows and columns.

## Implementation: Distance Kernel ()

```

1  /* Distance kernel (Implements Pearsons Correlation).
2  * This code has adapted from the paper "Compute pairwise Manhattan
3  * distance and Pearson correlation coefficient of data points with
4  * GPU" by Chang et al. (2009) but instead of computing the whole
5  * distance matrix, we compute a chunk of size (chunkSize x chunkSize)
6  * of the complete matrix.
7  *
8  * Input Parameters:
9  * @param Ina      : Input matrix (nRow x nCol)
10 * @param Da       : Distance matrix chunk (chunkSize x chunkSize)
11 * @param chunkSize : Total number of rows in a chunk
12                   (must be multiple of b)
13 * @param split    : split ID
14 * @param chunk    : chunk ID
15 * @param nExtraCol : No. of extra columns added afterwards
16 * @param nColExtended : Total number of columns in the
17                       extended input matrix
18 * Output:
19 * none, Da[] left on the device memory
20 */
21
22
23
24 // Computes Pearsons Correlation
25 __global__ void PearsonDistanceKernel(float *Ina, float *Da,
26                                     int chunkSize, int split, int chunk, int nRow,
27                                     int nCol, int nExtraCol, int nColExtended)
28 {
29
30     __shared__ float Xs[b][b];
31     __shared__ float Ys[b][b];
32

```

```

33  int bx = blockIdx.x, by = blockIdx.y;
34  int tx = threadIdx.x, ty = threadIdx.y;
35  /* Adapted from Chang et al. (2009) */
36  int xBegin = (bx + (chunkSize/b) * chunk) * b * nCol;
37  int yBegin = (by + (chunkSize/b) * split) * b * nCol;
38
39  int yEnd = yBegin + nCol - 1;
40  int x, y, i, index;
41
42  float a1, a2, a3, a4, a5;
43  float avgX, avgY, varX, varY, cov, rho;
44
45  a1 = a2 = a3 = a4 = a5 = 0.0;
46  for(y=yBegin,x=xBegin;y<=yEnd;y+=b,x+=b){
47
48      /* load partial data into shared memory */
49      Ys[ty][tx] = Ina[y + ty*nCol + tx];
50      Xs[tx][ty] = Ina[x + ty*nCol + tx];
51      __syncthreads();
52
53      /* Calculate and accumulate partial similarity/distance */
54      for(i = 0; i < b; i++){
55          if (nExtraCol!=0
56              && (y>=(yBegin +(nColExtended-b)))
57              && (i>= nCol-(nColExtended-b)))
58              continue;
59
60          a1 += Xs[i][tx];
61          a2 += Ys[ty][i];
62          a3 += Xs[i][tx] * Xs[i][tx];
63          a4 += Ys[ty][i] * Ys[ty][i];
64          a5 += Xs[i][tx] * Ys[ty][i];
65      }
66      __syncthreads();
67
68  }
69  avgX = a1/nCol;
70  avgY = a2/nCol;
71  varX = (a3-avgX*avgX*nCol)/(nCol-1);
72  varY = (a4-avgY*avgY*nCol)/(nCol-1);
73  cov = (a5-avgX*avgY*nCol)/(nCol-1);
74  rho = cov/sqrtf(varX*varY);
75
76  /* Identify the location (index) of the computed distance
77  in the chunk of distance matrix */
78
79  index = by*b*chunkSize + ty*chunkSize + bx*b + tx;
80  Da[index] = rho;
81
82  }

```

## $k$ NN Kernel Algorithm

---

**Algorithm 3:**  $k$ NN kernel Algorithm

---

**Input** :  $D$ , a chunk of the original distance matrix;  
 $n_{\text{chunksize}}$ , dimension of the chunk;  
 $\text{Maxk}$ , an array to hold the farthest neighbors for each row index in the chunks;

**Output:** none, an (intermediate)  $k$ NN graph stored in  $\text{Gk}'$ ;

```
1 row' ← blockIdx.x × blockDim.x + threadIdx.x;
2 if row' < n_chunksize then
3   initialize row /* absolute index in the original distance
   matrix */;
4   for column' ← 1 to n_chunksize do
5     initialize column /* absolute index in the original
     distance matrix */;
6     if row ← column or row > n_row or column > n_col then
7       continue /* exclude diagonal and pad regions */;
8     if D[row' × n_chunksize + column'] < Gk'[Maxk[row']].weight then
9       Gk'[Maxk[row']].source ← row;
10      Gk'[Maxk[row']].target ← column;
11      Gk'[Maxk[row']].weight ← D[row' × n_chunksize + column'];
12      Search the new maximum element in row'(D) and store the
      index in Maxk[row'];
```

---

**Computation of the  $k$ NNs from a distance matrix chunk:** The  $k$ NN Kernel algorithm utilizes an 1-dimensional thread and block structure. Here, each thread works on a single row (chunk) and identifies the  $k$ -nearest neighbors for respective row index, where an array  $\text{Maxk}$  holds the location of the farthest  $k$ -neighbor. For each row index (chunk) the respective farthest  $k$ -neighbor is investigated and replaced if the distance to any element  $[i]$ ,  $i \leftarrow 1 \dots n_{\text{chunksize}}$  is found smaller. However, every index is not checked, rather based on the position of chunk in the original distance matrix the algorithm skips certain indices, for example, it excludes the diagonal indices (i.e., the distance from the point itself) for the chunks in diagonal positions and similarly it exclude the indices of the extra (pad) regions in the original distance matrix.

## Implementation: $k$ NN Kernel

```
1  /*
2  *
3  * Implements kNNKernel Algorithm
4  *
5  * Input Parameters:
6  *
7  * @param Da          : Distance matrix chunk (chunkSize x chunkSize)
8  * @param Gka         : An array of 3-tuples {source,target,weight}
9                       : to store the kNN graph (Gka)
10 * @param Maxka       : An array that contains the index of the
11                       : farthest nearest neighbours of
12                       : each node (in a chunk)
13 * @param chunkSize   : Total number of rows in a chunk
14 * @param nRow        : Total rows in the original distance matrix
15 * @param nExtraRow   : Extra rows added to fit all the chunks
16 * @param split       : split ID
17 * @param chunk       : chunk ID
18 * @param splitSize   : Total number of chunks in a split
19 * @param chunkSize   : Total number of rows in a chunk
20 * @param tid         : Openmp threadID (segment/gpu ID)
21 * @param k           : Integer value of k
22 *
23 * Output:
24 * none, kNN graph (Gka) will be left on the device.
25 *
26 *
27 */
28
29 __global__ void kNNKernel (float* Da, float3* Gka, int *Maxka,
30                            int chunkSize, int nExtraRow, int split,
31                            int chunk, int splitSize, int nRow,
32                            int tid, int segmentSize, int k)
33 {
34
35 /* Identify the row by thread id*/
36
37 int row = blockIdx.x*blockDim.x + threadIdx.x;
38
39 /* If the identified row belongs to the chunk*/
40 if (row < chunkSize)
41 {
42
43     /* Set the search range */
44     int beginSearch = (split - tid * segmentSize) * k
45                     * chunkSize + row * k ;
46     int endSearch   = beginSearch + k;
47     /*Search by Columns of the chunk*/
```

```

48     for(int column=0;column < chunkSize ; column++){
49
50         /* For Chunks in the diagonal of the original matrix */
51         if(split == chunk){
52
53             if(row != column){ //skip distance from the point itself
54
55                 /* Exclude the diagonal and extra regions
56                 of the matrix*/
57
58                 if (( nExtraRow !=0 )
59                     && ((split >= splitSize - 1 )
60                         || (chunk >= splitSize - 1 ))
61                         && (row >= chunkSize - nExtraRow
62                             || column >= chunkSize-nExtraRow ))
63                     continue;
64
65
66
67                 if(( *(Gka + *(Maxka + row ))).z >
68                     *(Da + chunkSize * row + column )) {
69
70                     ( *(Gka + *(Maxka + row ))).z
71                     = *(Da + chunkSize * row + column );
72
73                     ( *(Gka + *(Maxka + row ))).x
74                     = split * chunkSize + row;
75
76                     ( *(Gka + *(Maxka + row ))).y
77                     = chunk * chunkSize + column;
78
79                     /* Search the index of the max element
80                     within range */
81                     for (int index = beginSearch;
82                         index < endSearch;
83                         index++){
84
85                         if(( *(Gka+index)).z >
86                             (*(Gka + *(Maxka + row ))).z )
87                             *(Maxka+row) = index;
88
89                         } // inner for loop
90
91                     } //if
92
93                 } // if row != column
94
95             } // if split == chunk
96         /* For chunks in non-diagonal positions of
97         the original matrix */

```

```

98
99     else
100    {
101        /* Exclude the extra regions of the matrix*/
102
103        if ((nExtraRow != 0)
104            && (column >= chunkSize - nExtraRow
105                && chunk >= splitSize-1)
106            || (nExtraRow != 0)
107                && (row >= chunkSize - nExtraRow
108                    && split >= splitSize-1))
109            continue;
110
111        if(( *(Gka + *(Maxka + row)).z >
112            *( Da + chunkSize * row + column ))){
113
114            ( *(Gka + *(Maxka + row)).z
115                = *(Da + chunkSize * row + column);
116
117            ( *(Gka + *(Maxka + row)).x
118                = split * chunkSize + row;
119
120            ( *(Gka + *(Maxka + row)).y
121                = chunk * chunkSize + column;
122
123
124            /* Search the index of the max element
125            within range */
126            for (int index = beginSearch;
127                index < endSearch;
128                index ++){
129
130                if((*(Gka+index)).z >
131                    (*(Gka + *(Maxka + row)).z)
132                    *(Maxka + row) = index;
133            } // inner for loop
134
135        } // if
136
137    } // (else condition) i.e., if split != chunk
138
139 } // for loop ends
140
141 } // if row < chunkSize
142
143 }

```

## Data Structures

The input data set is represented in the form of a matrix, where each row represents a point and the respective columns represent the dimensions of the point. The complete input matrix contains  $n_{row}$  number of rows and  $n_{col}$  number of columns. Since, CUDA programming API does not support transferring of multidimensional arrays from host to device memory, we store the input matrix in a single dimensional array  $In$  of length  $(n_{row} \times n_{col})$ , the distance matrix chunks in a single dimensional array  $D$  of length  $(n_{chunksize} \times n_{chunksize})$ , given a fixed chunk size,  $n_{chunksize}$  and the resultant  $k$ NN graph ( $Gk$ ) in an array of 3-tuples  $\{source, target, weight\}$  of length  $(k \times n_{row})$ . Additionally, we store the location of the farthest  $k$  nearest neighbours for each row index and chunk in an array  $Maxk$  to facilitate the  $k$ NN search.

```
1
2 /* An array of 3-tuples {source,target,weight} to store the kNN graph (Gka),
3    this can be replaced by a structure such as
4
5     typedef struct
6     {
7         int source;
8         int target;
9         float weight;
10    } Edge;
11    Edge *Gka;
12
13    */
14
15    float3 *Gka;
16
17    float3 *Gka_sub; // A pointer to Gka (for a segment)
18
19    float *Ina; // Holds the input matrix
20    float *Da; // Holds chunk of the original distance matrix
21
22    int k; // user defined value of k
23    int chunkSize; // user defined chunk size
24    int *Maxka; // An array to hold the farthest value of k
25
26    int nRow; //Total Number rows in the input matrix
27    int nCol; //Total Number columns in the input matrix
```

## Program Execution

We show a sample demonstration, input and output of our program in this section.

### Input file format

Filename:Microarrays\_CIBM\_format.txt

```
1 <MicroarrayData>
2 10      6
3 F_1    1      4.5    2      7.3    8.21   5.71
4 F_2    1      3      8      6.66   7.19   1.06
5 F_3    3      3      9      5      6.67   7.73
6 F_4    4      4      1      4      3.64   2.92
7 F_5    8      7      1.5    4      4.91   6.15
8 F_6    8      6      3      2.4    7.36   4.76
9 F_7    3      8      3      3.2    5.31   5.49
10 F_8    2      1      4.02   5.8    3.08   7.15
11 F_9    4      1      3.7    2.2    1.31   1.48
12 F_10  -3      0      3      1      3.82   2.7
13 <SamplesNames>
14      C1      C2      C3      C4      C5      C6
15 <SamplesClasses>
16      1      1      1      0      0      0
17 <EndOfFile>
```

### Running the Program

```
1 @mendel:~/gpufsknn Microarrays_CIBM_format.txt
2
3 File Name (input)= TestData.bio.csv
4
5 Calculation starts at time : 17:15:49
6 Features (nRow) = 10 Samples(nCol) = 6
7 Data file loaded successfully...!
8 Type = Microarray
9 number of host CPUs: 16
10 number of CUDA devices: 1
11 0: Tesla C2050
12 -----
13 Total no of chunks in each split (splitSize): 1
14 Total no of splits in each segment (segmentSize): 1
15 CPU thread 0 (of 1) uses CUDA device 0
16 kNN computation finished at time : 17:15:55
17 Writing...output File Name = Microarrays_CIBM_format.txt.knn
```



**Output file: Microarrays\_CIBM\_format.txt.knn**

```
1 10 30
2 0 5 -0.145362
3 0 8 -0.782624
4 0 4 -0.117918
5 1 5 -0.480781
6 1 4 -0.866238
7 1 3 -0.415669
8 2 5 -0.486956
9 2 4 -0.763127
10 2 3 -0.833721
11 3 9 -0.520289
12 3 1 -0.415669
13 3 2 -0.833721
14 4 9 -0.673579
15 4 1 -0.866238
16 4 2 -0.763127
17 5 7 -0.620824
18 5 1 -0.480781
19 5 2 -0.486956
20 6 7 -0.317340
21 6 1 -0.292388
22 6 8 -0.834691
23 7 4 -0.367099
24 7 5 -0.620824
25 7 6 -0.317340
26 8 0 -0.782624
27 8 6 -0.834691
28 8 9 -0.426985
29 9 8 -0.426985
30 9 4 -0.673579
31 9 3 -0.520289
```

## Conclusion

We developed a software tool based on our scalable approach for computing large-scale  $k$ NN graph using GPU and CUDA (FS- $k$ NN-GPU). The source code is available under GNU Public License (GPL) at <https://sourceforge.net/p/gpufsknn/>

This is a hybrid approach where the host is responsible for loading, chunking and distributing the data and computation to the device, where the device uses two kernels to compute the distance and  $k$ NNs of each feature in the data set. The basic approach is simple and adaptable with other parallel frameworks. Outcome of our proposed tool can be used to generate approximate minimum spanning trees (AMST), minimum spanning forests (MSFs) [4] or clusters from large-scale biological data sets, such as microarrays (See [3]). We believe this work can provide compelling benefits for several domains of bioinformatics data mining.

## References

- [1] Chang D, Jones NA, Li D, Ouyang M, Ragade RK: Compute pairwise Euclidean distances of data points with GPUs. In *Proc. of the IASTED International Symposium on Computational Biology and Bioinformatics*, IASTED 2008:278–283.
- [2] Chang D, Desoky AH, Ouyang M, C RE: Compute pairwise Euclidean distances of data points with GPUs. In *Proc. of the 10th ACIS International Conference on Software Engineering, Artificial Intelligence, Networking and Parallel/Distributed Computing*, ACIS 2009:501–506.
- [3] Arefin AS, Inostroza-Ponta M, Mathieson L, Berretta R, Moscato P: Clustering Nodes in Large-Scale Biological Networks Using External Memory Algorithms. In *ICA3PP (2), Volume 7017 of Lecture Notes in Computer Science*. Edited by Xiang Y, Cuzzocrea A, Hobbs M, Zhou W, Springer 2011:375–386.
- [4] Arefin AS, Riveros C, Berretta R, Moscato P (2012) knn-borvka-gpu: A fast and scalable mst construction from knn graphs on gpu. In: Murgante B, Gervasi O, Misra S, Nedjah N, Rocha AMAC, et al., editors, ICCSA (1). Springer, volume 7333 of *Lecture Notes in Computer Science*, pp. 71-86.

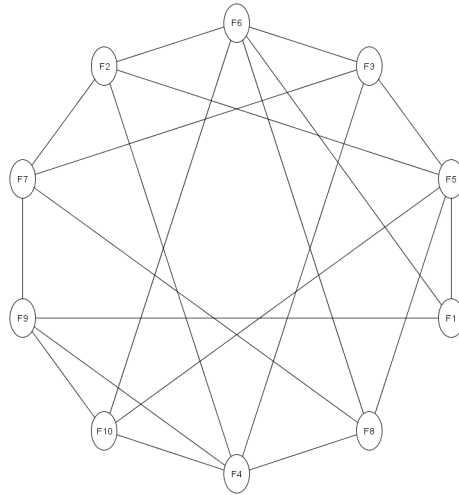

Figure 1: Results can be visualized using yEd (<http://www.yworks.com>) GML visualization tool. Visualization of the 3NN graph generated by the input file.

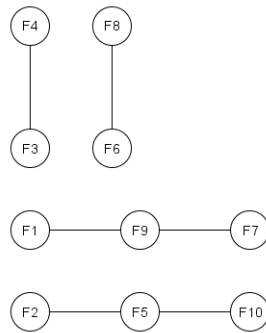

Figure 2: Visualization of the clustering created using the  $k$ NN graph and the MST $k$ NN+ algorithm in [3].
